# Supplementary material for: Thin silica shell on Ag3PO4 nanoparticles augments stability and photocatalytic reusability
Source: Royal Society of Chemistry journal article supplement (doi:10.1039/d3ra05023h), 2023-01-01
Supplement: d3ra05023h1.pdf [file d3ra05023h1.pdf]

## Supporting Information

### Thin Silica Shell on $\text{Ag}_3\text{PO}_4$ Nanoparticles Augments Stability and Photocatalytic Reusability

*P. Kavya<sup>a</sup>, S. Priya<sup>b</sup>, K. Pradeesh<sup>c</sup>, K. Sandeep<sup>a</sup>, K. P. Saranya<sup>a</sup>, V. L. Thomas<sup>d</sup>, M.*

*Shanthil,<sup>\*a</sup>*

E-mail: \**shanthilm@gvc.ac.in, shanthilm@gmail.com*

#### 1.0 Experimental Details

All chemicals and reagents were purchased from sigma Aldrich, Merck, Nice chemicals, Isochem and were used as received without any further purification. All the glasswares were used after washed and cleaned with distilled water.

#### 1.1 Instrumentation

UV-Vis experiments were conducted on T90+ UV-VIS Spectrophotometer. P-XRD patterns were acquired using PANALYTICAL, Aeris Research, Cu  $K\alpha$  as the source. Solid-state absorption spectra are recorded on Ocean optics Maya 2000 Pro-UV Compact Spectrometer which is taken by coating the photocatalyst on a glass surface and dried at 100<sup>0</sup>C for 1 hr. BaSO<sub>4</sub> is used as reflectance standard. High resolution- TEM analysis recorded on FEI-TECNAI-G2 F30.S-TWIN-TEM 300 kV in which sample is well sonicated and taken on a carbon coated Cu grid. Chemical composition of the prepared photocatalyst by X-ray Photoelectron spectroscopy which is carried out in Omicron nanotechnology Ltd, Germany. Total organic carbon (TOC) analysis carried out by Analytica Jena, multiN/C 3100 instrument. Electrochemical studies (Cyclic Voltammetry) were carried out by CH Instruments Electrochemical Analysis.

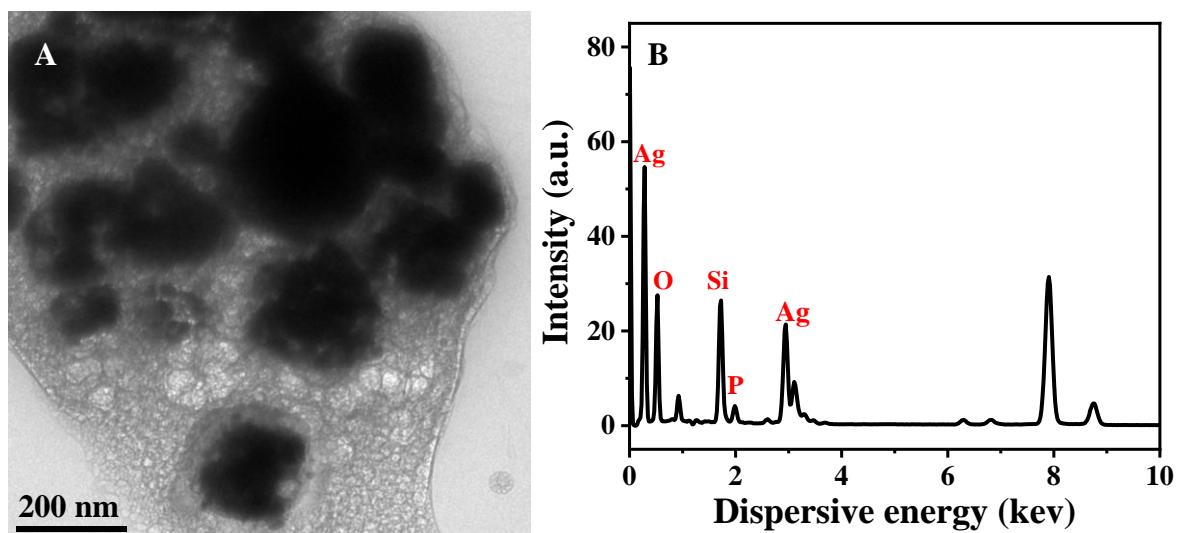

**Figure S1.** (A) HR-TEM image of  $\text{Ag}_3\text{PO}_4@\text{SiO}_2$ . (B) EDX spectra of  $\text{Ag}_3\text{PO}_4@\text{SiO}_2$

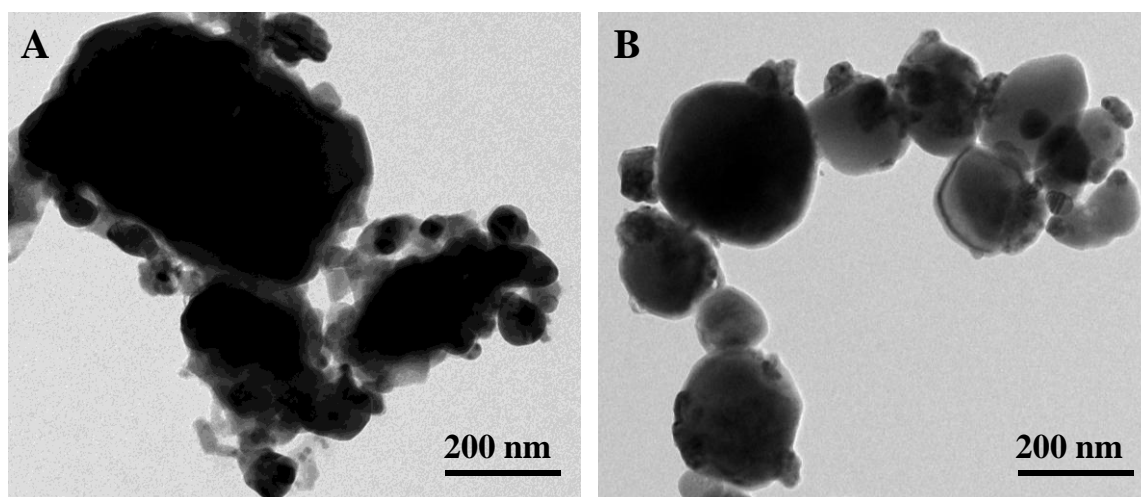

**Fig S2-** TEM images of A) Bare  $\text{Ag}_3\text{PO}_4$  and B)  $\text{Ag}_3\text{PO}_4@\text{SiO}_2$  after photocatalytic degradation.

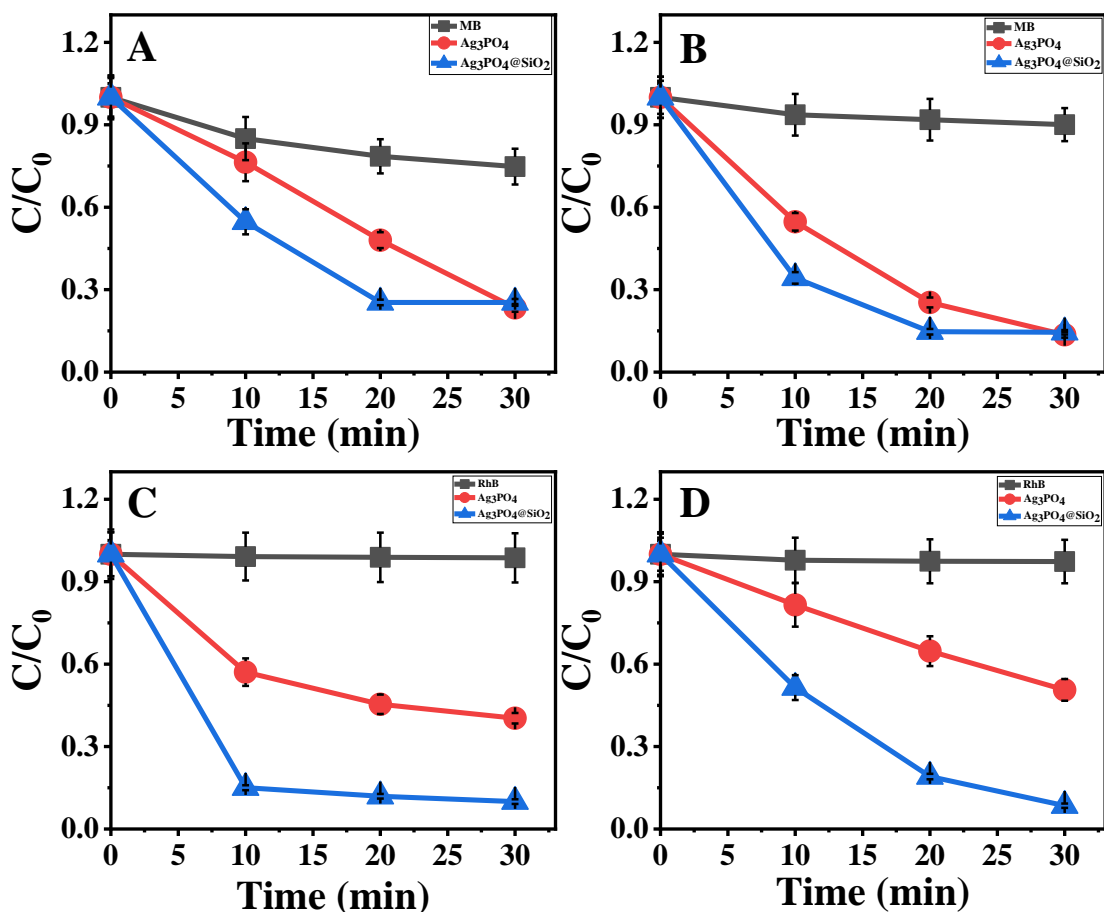

**Fig S3-** Photocatalytic degradation of methylene blue alone, with bare  $Ag_3PO_4$ , and  $Ag_3PO_4@SiO_2$ . A) under 365 nm light B) under 450 nm light. Photocatalytic degradation of Rhodamine B alone, with bare  $Ag_3PO_4$  and  $Ag_3PO_4@SiO_2$ . C) under 365 nm light D) under 450 nm light.

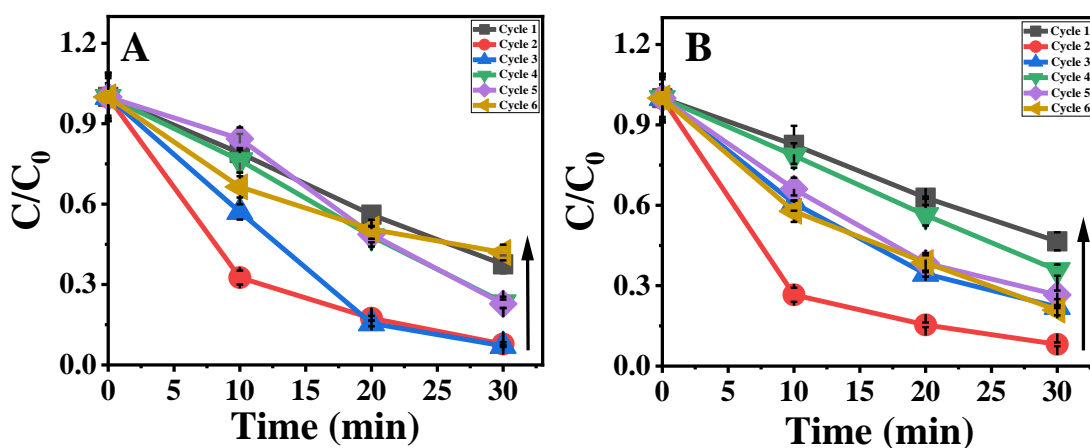

**Fig S4.** Photocatalytic degradation of methylene blue (MB) (A) Bare  $\text{Ag}_3\text{PO}_4$  and (B)  $\text{Ag}_3\text{PO}_4@ \text{SiO}_2$  under 365 nm light having power of 125 W.

## 2. Photophysical studies

$1.6 \times 10^{-5} \text{M}$  of methylene blue and Rhodamine B solutions were prepared in water. 0.86 mg of catalyst were added to the solution. All the photophysical experiments were carried out at room temperature in a glass cuvette having a path length of 1 cm. Absorption spectra were recorded on T90+ UV-VIS Spectrophotometer. The solution is magnetically stirred for 30 minutes under dark for establishing adsorption-desorption equilibrium.

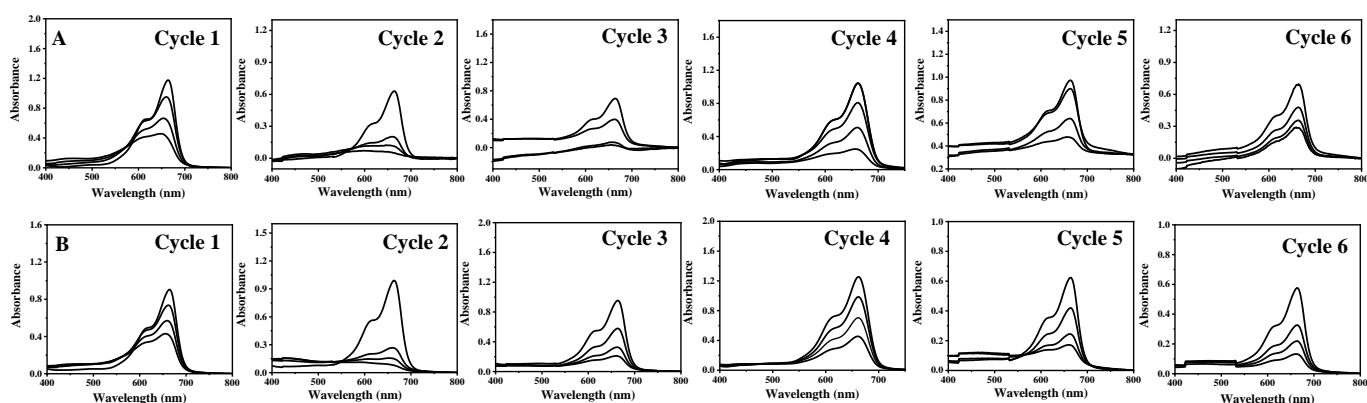

**Fig S5.** UV-Vis absorption spectra of Methylene blue under 365 nm light (A)  $\text{Ag}_3\text{PO}_4$  (B)  $\text{Ag}_3\text{PO}_4@ \text{SiO}_2$

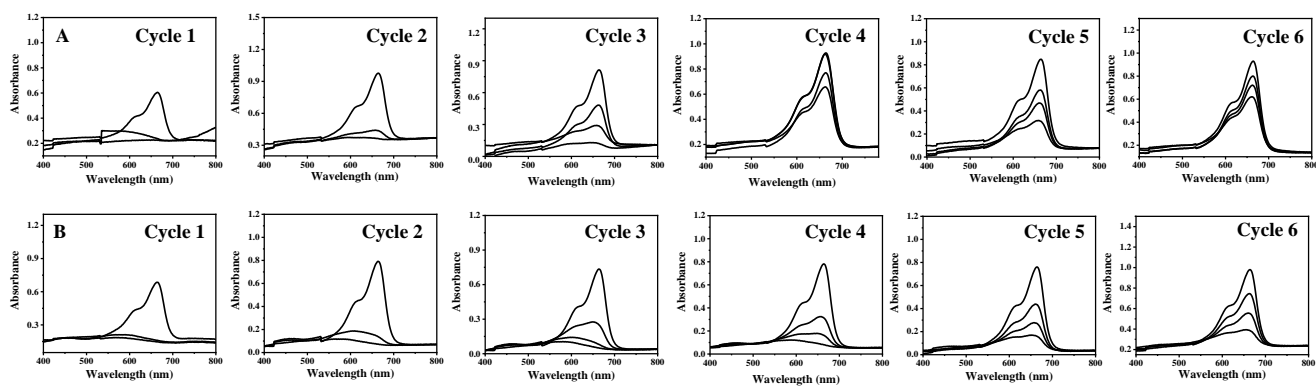

**FigS6. A)** UV-Vis absorbance spectra of MB dye under 450 nm light of bare  $\text{Ag}_3\text{PO}_4$  **B)**  $\text{Ag}_3\text{PO}_4@SiO_2$

**Table 1-** Total organic carbon analysis (TOC)

| Initial concentration ( $\text{mgL}^{-1}$ ) |                                | Percentage of mineralization after photodegradation (%) |
|---------------------------------------------|--------------------------------|---------------------------------------------------------|
| 4.38                                        | $\text{Ag}_3\text{PO}_4$       | 92 %                                                    |
|                                             | $\text{Ag}_3\text{PO}_4@SiO_2$ | 92 %                                                    |

**Table 2.** Photodegradation efficiency of  $\text{Ag}_3\text{PO}_4$  and  $\text{Ag}_3\text{PO}_4@SiO_2$  in methylene blue and Rhodamine B under 450 nm light.

| Methylene blue degradation efficiency (%) |         |         |         |         |         |         |
|-------------------------------------------|---------|---------|---------|---------|---------|---------|
|                                           | Cycle 1 | Cycle 2 | Cycle 3 | Cycle 4 | Cycle 5 | Cycle 6 |
| $\text{Ag}_3\text{PO}_4$                  | 92%     | 98%     | 96%     | 75%     | 51%     | 49%     |
| $\text{Ag}_3\text{PO}_4@SiO_2$            | 92%     | 91%     | 91%     | 94%     | 96%     | 85%     |
| Rhodamine B degradation efficiency (%)    |         |         |         |         |         |         |
| $\text{Ag}_3\text{PO}_4$                  | 82%     | 73%     | 61%     | 50%     | 20%     | 11%     |
| $\text{Ag}_3\text{PO}_4@SiO_2$            | 98%     | 98%     | 98%     | 92%     | 58%     | 47%     |

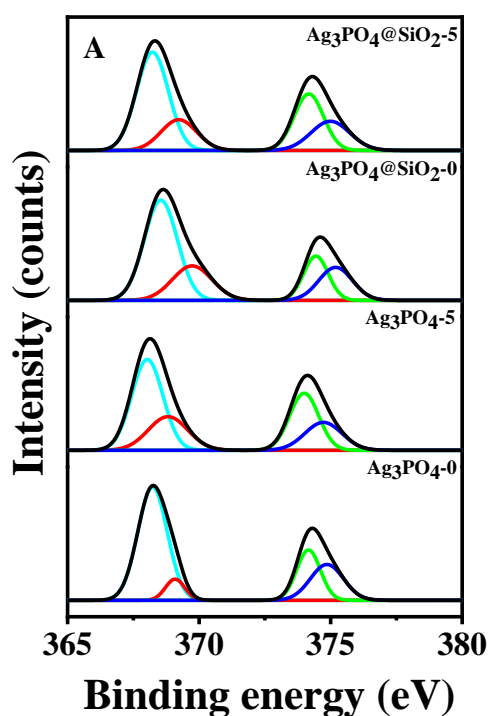

**Fig S7 –A)** XPS analysis of Ag<sub>3</sub>PO<sub>4</sub> and Ag<sub>3</sub>PO<sub>4</sub>@SiO<sub>2</sub> before and after 5 cycles of photodegradation. Deconvoluted spectra of Ag 3d<sub>5/2</sub> and Ag 3d<sub>3/2</sub> peaks of Ag<sup>+</sup> and Ag<sup>0</sup> in the bare Ag<sub>3</sub>PO<sub>4</sub>-0 and Ag<sub>3</sub>PO<sub>4</sub>@SiO<sub>2</sub>-0 (before photodegradation), Ag<sub>3</sub>PO<sub>4</sub>-5 and Ag<sub>3</sub>PO<sub>4</sub>@SiO<sub>2</sub>-5 (5 cycles of photodegradation).

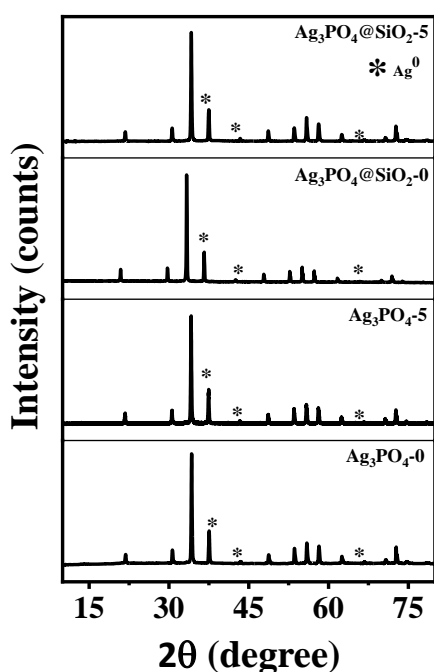

**Fig S8-** XRD patterns of Ag<sub>3</sub>PO<sub>4</sub> and Ag<sub>3</sub>PO<sub>4</sub>@SiO<sub>2</sub> before (Ag<sub>3</sub>PO<sub>4</sub>-0 and Ag<sub>3</sub>PO<sub>4</sub>@SiO<sub>2</sub>-0) and after 5 cycles of photodegradation (Ag<sub>3</sub>PO<sub>4</sub>-5 and Ag<sub>3</sub>PO<sub>4</sub>@SiO<sub>2</sub>-5). The peaks corresponding to Ag<sup>0</sup> is marked.

## Kinetic Data

**Table 3-** Kinetic data of of  $\text{Ag}_3\text{PO}_4$  and  $\text{Ag}_3\text{PO}_4@\text{SiO}_2$  under 450 nm light in methylene blue.

| 450 nm Xenon lamp (MB) |                                       |                                     |        |
|------------------------|---------------------------------------|-------------------------------------|--------|
| No. of Cycles          |                                       | Slope ( $\text{min}^{-1}$ )         | $R^2$  |
| Cycle 1                | $\text{Ag}_3\text{PO}_4@\text{SiO}_2$ | $-0.0549 \pm 0.0016$                | 0.9992 |
|                        | $\text{Ag}_3\text{PO}_4$              | $-0.0651 \pm 0.0088$                | 0.9822 |
| Cycle 2                | $\text{Ag}_3\text{PO}_4@\text{SiO}_2$ | $-0.0595 \pm 0.0130$                | 0.9077 |
|                        | $\text{Ag}_3\text{PO}_4$              | $-0.0805 \pm 0.0036$                | 0.9980 |
| Cycle 3                | $\text{Ag}_3\text{PO}_4@\text{SiO}_2$ | $-0.0416 \pm 0.0028$                | 0.9955 |
|                        | $\text{Ag}_3\text{PO}_4$              | $-0.0380 \pm 0.0048$                | 0.9686 |
| Cycle 4                | $\text{Ag}_3\text{PO}_4@\text{SiO}_2$ | $-0.0392 \pm 0.0010$                | 0.9976 |
|                        | $\text{Ag}_3\text{PO}_4$              | $-0.0101 \pm 2.6442 \times 10^{-4}$ | 0.9986 |
| Cycle 5                | $\text{Ag}_3\text{PO}_4@\text{SiO}_2$ | $-0.0263 \pm 0.0010$                | 0.9939 |
|                        | $\text{Ag}_3\text{PO}_4$              | $-0.0102 \pm 0.0018$                | 0.9426 |
| Cycle 6                | $\text{Ag}_3\text{PO}_4@\text{SiO}_2$ | $-0.0228 \pm 0.0020$                | 0.9747 |
|                        | $\text{Ag}_3\text{PO}_4$              | $-0.0071 \pm 5.3023 \times 10^{-4}$ | 0.9889 |

**Table 4.** Kinetic data of of  $\text{Ag}_3\text{PO}_4$  and  $\text{Ag}_3\text{PO}_4@\text{SiO}_2$  under 450 nm light in Rhodamine B.

| 450 nm Xenon lamp (Rhodamine B) |                                       |                             |        |
|---------------------------------|---------------------------------------|-----------------------------|--------|
| No. of Cycles                   |                                       | Slope ( $\text{min}^{-1}$ ) | $R^2$  |
| Cycle 1                         | $\text{Ag}_3\text{PO}_4@\text{SiO}_2$ | $-0.0374 \pm 0.0172$        | 0.8253 |
|                                 | $\text{Ag}_3\text{PO}_4$              | $-0.0212 \pm 0.0000$        | 0.9930 |
| Cycle 2                         | $\text{Ag}_3\text{PO}_4@\text{SiO}_2$ |                             | 0.9539 |

|         |                                                   |                                   |        |
|---------|---------------------------------------------------|-----------------------------------|--------|
|         |                                                   | -0.0413±0.0091                    |        |
|         | Ag <sub>3</sub> PO <sub>4</sub>                   | -0.0238± 9.685                    | 0.9967 |
| Cycle 3 | Ag <sub>3</sub> PO <sub>4</sub> @SiO <sub>2</sub> | -0.0391±0.0064                    | 0.9738 |
|         | Ag <sub>3</sub> PO <sub>4</sub>                   | -0.0194± 8.9489 *10 <sup>-4</sup> | 0.9979 |
| Cycle 4 | Ag <sub>3</sub> PO <sub>4</sub> @SiO <sub>2</sub> | -0.0343±0.0039                    | 0.9869 |
|         | Ag <sub>3</sub> PO <sub>4</sub>                   | -0.0145 ± 6.0497                  | 0.9965 |
| Cycle 5 | Ag <sub>3</sub> PO <sub>4</sub> @SiO <sub>2</sub> | -0.0204 ±0.0035                   | 0.9720 |
|         | Ag <sub>3</sub> PO <sub>4</sub>                   | -0.0058 ± 2.0297                  | 0.9976 |
| Cycle 6 | Ag <sub>3</sub> PO <sub>4</sub> @SiO <sub>2</sub> | -0.0145± 0.0021                   | 0.9794 |
|         | Ag <sub>3</sub> PO <sub>4</sub>                   | 0.0029 ± 1.0344                   | 0.9976 |

### 3. Electrochemical studies

Cyclic voltammetry is a three-electrode system. The prepared Ag<sub>3</sub>PO<sub>4</sub>/SiO<sub>2</sub> which is coated on a glass plate sandwiched with FTO plate was employed as working electrode. A platinum electrode and Ag/AgCl electrode was used as counter electrode and reference electrode respectively. 0.1M of tetra butyl ammonium hexafluorophosphate in 10 ml acetonitrile is used as electrolyte. The cyclic voltammogram is measured between -1V to +1V at a scan rates of 0.1 V/Sec and 0.05V/Sec. All Cyclic voltammograms were taken after degassing the electrolyte with N<sub>2</sub> gas. All electrochemical experiments were carried out at room temperature.



## Modification of working electrode

Synthesized  $\text{Ag}_3\text{PO}_4@\text{SiO}_2$  is dispersed in THF. spin coated on a glass plate of width 1 cm and length 3 cm at 300 rpm. A thin layer of  $\text{Ag}_3\text{PO}_4@\text{SiO}_2$  was coated on the glass plate. Spin coated glass plate was dried in hot over at 100o C for 30 minutes. FTO of 1cm width and 5 cm length is washed in acetone and dried.  $\text{Ag}_3\text{PO}_4@\text{SiO}_2$  coated glass plate is sandwiched with the conducting side of FTO plate and tied with a Teflon tape.

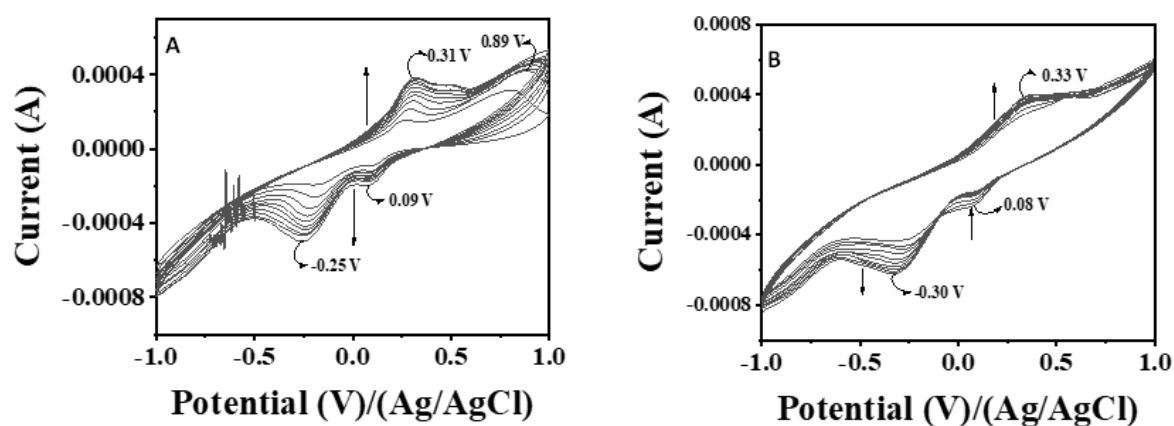

Fig S9. Cyclic voltammogram of  $\text{Ag}_3\text{PO}_4@\text{SiO}_2$ . A- scan rate of 0.05 V/sec, B- scan rate of 0.1 V/sec.

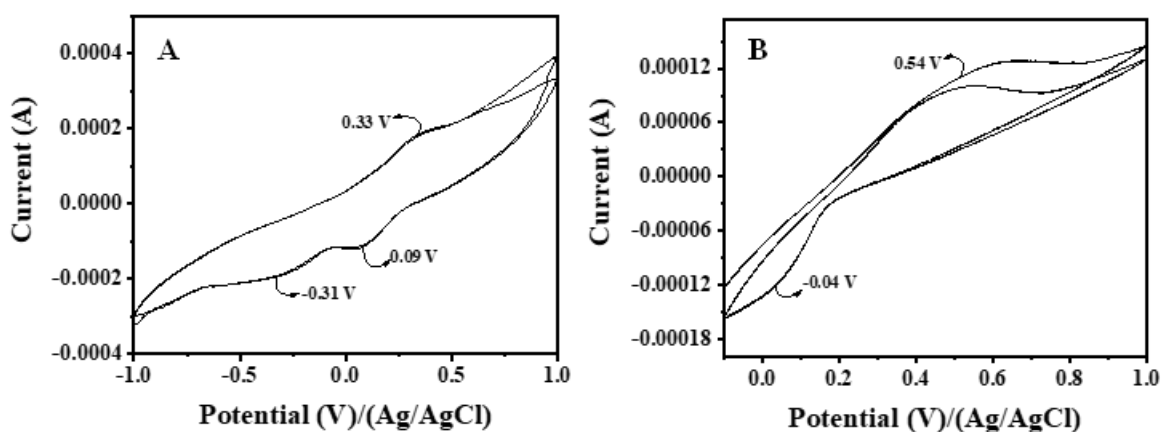

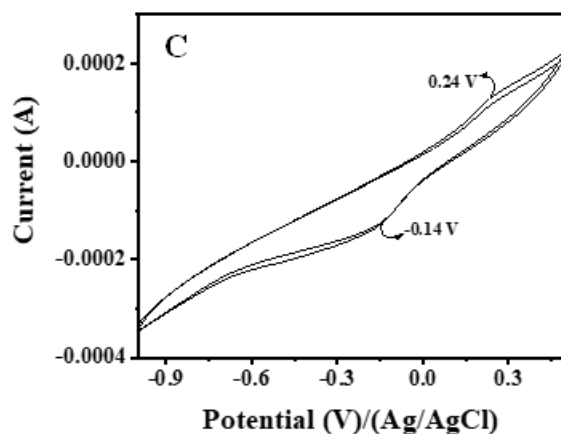

**Fig S10.A-**  $\text{Ag}_3\text{PO}_4@\text{SiO}_2$  in the absence of light under same conditions. **B-** Voltammogram of  $\text{Ag}_3\text{PO}_4@\text{SiO}_2$  between potential -0.1 V and +1 V. **C-** Voltammogram of  $\text{Ag}_3\text{PO}_4@\text{SiO}_2$  between potential between -1 V to +0.5 V.

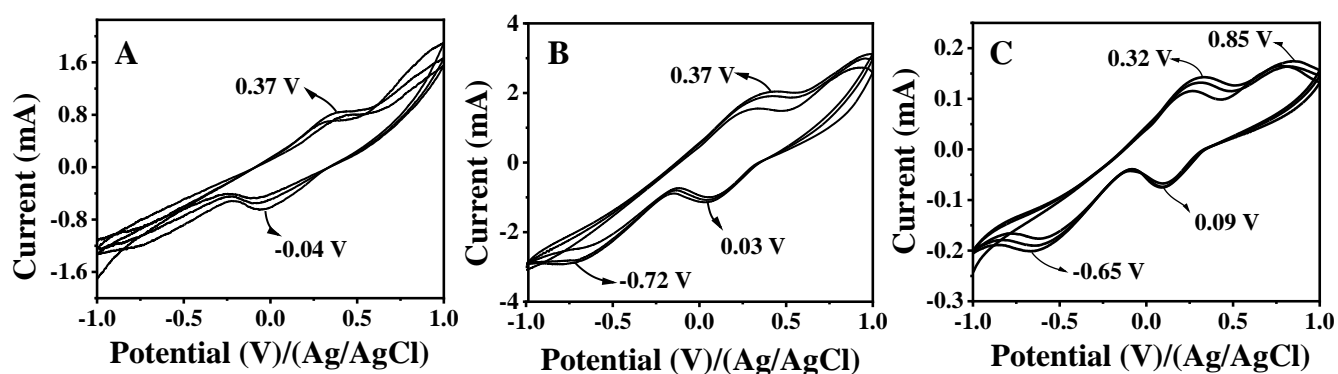

**Fig S11.** Voltammogram of  $\text{Ag}_3\text{PO}_4@\text{SiO}_2$  in the presence of light and water at a scan rate of 0.1 V/sec **A)** 0 min **B)** 15 min **C)** 30 min

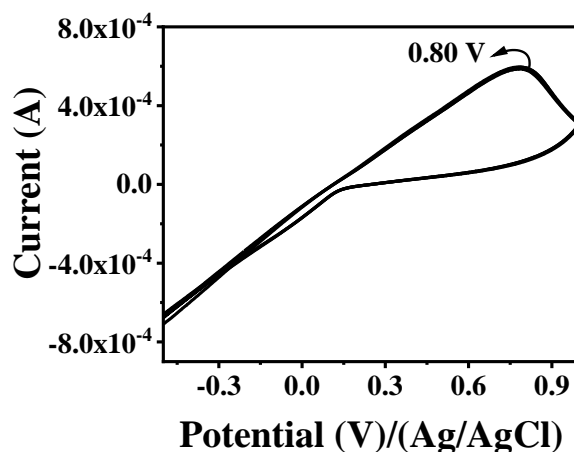

**Fig S12.** Voltammogram of bare  $\text{Ag}_3\text{PO}_4$  in presence of light and water at a scan rate of 0.1 V/sec

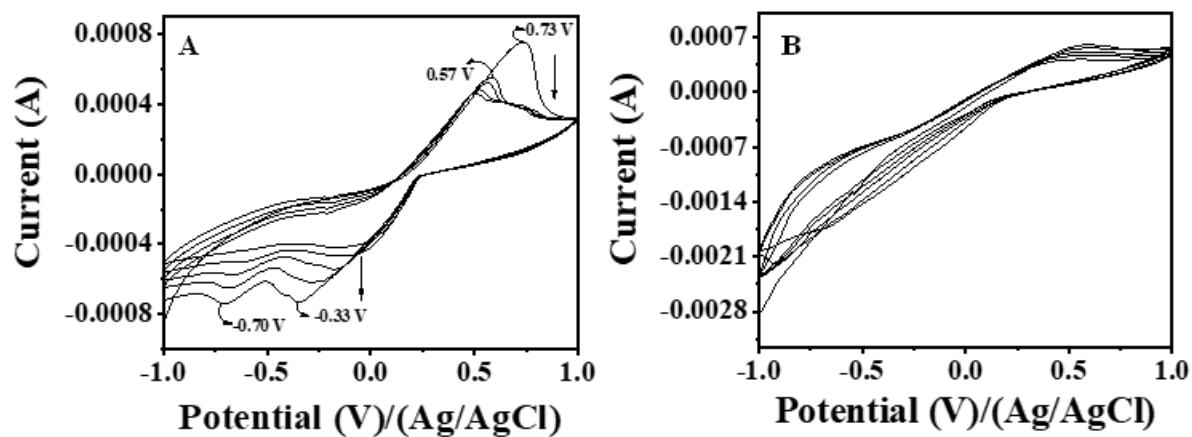

**Fig S13.** **A-** Addition of 1mM  $\text{AgNO}_3$  to the electrolyte in the presence of light and water. **B-** Addition of 1mM  $\text{AgNO}_3$  to the electrolyte in the Absence of light and water.
